# Supplementary material for: Recreational and occupational field exposure to freshwater cyanobacteria – a review of anecdotal and case reports, epidemiological studies and the challenges for epidemiologic assessment
Source: PubMed Central journal article supplement (PMC1513208; doi:10.1186/1476-069x-5-6), 2006-03-24
Supplement: 1476-069X-5-6-S1.pdf [file 1476-069X-5-6-S1.pdf]

## Anecdotal and case reports of human morbidity and mortality attributed to recreational or occupational field exposure to freshwater cyanobacteria

| Year                                                               | Season      | Location                               | Number affected                | Estimates of number unaffected                                            | Age                                     | Water activity                        | Signs & symptoms                                                                              | Dominant plankton                                                                                                             | Time of onset after exposure                                              | Symptom duration                                                                        | Diagnostic criteria                                                                                                                                                                            | Predisposing conditions                                                                                                                                                                                                        | Notes                                                                                                                         | References |
|--------------------------------------------------------------------|-------------|----------------------------------------|--------------------------------|---------------------------------------------------------------------------|-----------------------------------------|---------------------------------------|-----------------------------------------------------------------------------------------------|-------------------------------------------------------------------------------------------------------------------------------|---------------------------------------------------------------------------|-----------------------------------------------------------------------------------------|------------------------------------------------------------------------------------------------------------------------------------------------------------------------------------------------|--------------------------------------------------------------------------------------------------------------------------------------------------------------------------------------------------------------------------------|-------------------------------------------------------------------------------------------------------------------------------|------------|
| <b>Hayfever-like symptoms (conjunctivitis, rhinitis, sneezing)</b> |             |                                        |                                |                                                                           |                                         |                                       |                                                                                               |                                                                                                                               |                                                                           |                                                                                         |                                                                                                                                                                                                |                                                                                                                                                                                                                                |                                                                                                                               |            |
| 1934                                                               | Late summer | Muskego Lake, Waukesha County, WI, USA | Report of single subject, male | N/S                                                                       | 57                                      | Swimming                              | Itching of eyes, nasal congestion                                                             | "weedy lake"                                                                                                                  | 3 hours                                                                   | <48 hours                                                                               |                                                                                                                                                                                                | History of frequent sinus infections                                                                                                                                                                                           |                                                                                                                               | [53]       |
| 1935                                                               | Late summer | Muskego Lake, WI, USA                  | Same subject                   | N/S                                                                       |                                         | Swimming                              | Same symptoms, + mild asthma                                                                  |                                                                                                                               | As above                                                                  | As above                                                                                |                                                                                                                                                                                                |                                                                                                                                                                                                                                |                                                                                                                               | [53]       |
| 1936-1946                                                          | Late summer | North Lake, Waukesha County, WI, USA   | Same subject                   | N/S                                                                       |                                         | Swimming                              | Nasal discharge and congestion, conjunctivitis, mild asthma                                   | Oscillatoraceae (sample taken in late summer, 1944)                                                                           | N/S                                                                       | N/S                                                                                     | Surface scum extracts gave immediate skin reactions. Cutaneous injection of 0.03mL of 1:1,000 dilution resulted in mild asthma within 20 mins. Control subjects did not react to scum extracts | Subject swam in North Lake during summer months over the ten-year period, without incident until mid-August each year, when swimming was followed by symptom onset. Desensitisation injections over four years were successful |                                                                                                                               | [53]       |
| 1979                                                               | Late summer | Lake Wallenpaupack, PA, USA            | 5 (family group)               | N/S                                                                       | N/S (parents + son + daughter + friend) | Swimming                              | "Severe" hayfever-like symptoms (sneezing, nasal discharge, eye irritation): 3/5 earache: 2/5 | N/S. Lake developed a distinct green colour several days prior to incident. Three weeks later: heavy bloom of <i>Anabaena</i> | Hayfever symptoms: during exposure; earache: several hours after exposure | N/S                                                                                     |                                                                                                                                                                                                | N/S                                                                                                                                                                                                                            |                                                                                                                               | [68]       |
| 1979                                                               | Late summer | Lake Wallenpaupack, PA, USA            | 20-30                          | 60-90 (those affected comprised approx 25% of aquatic event participants) | N/S (high school students)              | Participating in school aquatic event | Eye irritation, sore throat, earache, sneezing, nasal discharge, swollen lips                 | N/S. see above                                                                                                                | During exposure or within 2-3 hours                                       | Within 2-3 days<br><br>*Subsequent exposure reportedly caused re-occurrence of symptoms |                                                                                                                                                                                                | N/S                                                                                                                                                                                                                            | Affected individuals were members of a high school summer aquatic program. The event was cancelled because of these illnesses | [68]       |
| N/S                                                                | N/S         | N/S                                    | Single male                    | N/S                                                                       | N/S (adult)                             | Swimming                              | Hayfever-like symptoms                                                                        | Bloom of <i>Microcystis</i>                                                                                                   | N/S                                                                       | N/S                                                                                     |                                                                                                                                                                                                | N/S                                                                                                                                                                                                                            |                                                                                                                               | [154]      |

| Year                      | Season                     | Location                                    | Number affected                  | Estimates of number unaffected                                                  | Age                                     | Water activity          | Signs & symptoms                                                                                                                                                                                               | Dominant plankton                                                                         | Time of onset after exposure       | Symptom duration                                  | Diagnostic criteria                                                                                                                   | Predisposing conditions              | Notes                                                                                                                                                | References |
|---------------------------|----------------------------|---------------------------------------------|----------------------------------|---------------------------------------------------------------------------------|-----------------------------------------|-------------------------|----------------------------------------------------------------------------------------------------------------------------------------------------------------------------------------------------------------|-------------------------------------------------------------------------------------------|------------------------------------|---------------------------------------------------|---------------------------------------------------------------------------------------------------------------------------------------|--------------------------------------|------------------------------------------------------------------------------------------------------------------------------------------------------|------------|
| <b>Cutaneous symptoms</b> |                            |                                             |                                  |                                                                                 |                                         |                         |                                                                                                                                                                                                                |                                                                                           |                                    |                                                   |                                                                                                                                       |                                      |                                                                                                                                                      |            |
| 1949-1952                 | Summer                     | Lake Carey, PA, USA                         | Report of single subject, female | Reported skin rash "never appeared in other bathers swimming in the same water" | 6 (condition first seen at age 3 years) | Swimming                | Seasonal erythematous papulo-vesicular rash, occasionally progressing to oozing and crusting. Rash limited to face, neck, shoulders, upper chest and extremities; rash never seen on areas covered by swimsuit | <i>Anabaena</i>                                                                           | 1-2 hours                          | < 2 weeks (if no further contact with lake water) | Skin patch testing; strong positives to <i>Anabaena</i> filtered from lake water, chloroform extract of same, and phycocyanin extract | None (apart from reported condition) | Rash never seen after swimming in artificial pools or ocean. Only seen after water exposure at Lake Carey, and once after bathing in a Canadian lake | [54]       |
| Late 1940s & mid 1950s    | Late summer                | Lake Ringsjön, Scania, Sweden               | "several" members of a family    | N/S                                                                             | N/S ("young girl" + siblings)           | Swimming                | Pruritic skin rashes                                                                                                                                                                                           | <i>Gloeotrichia echinulata</i>                                                            | N/S                                | N/S                                               |                                                                                                                                       |                                      |                                                                                                                                                      | [155, 156] |
| 1977                      | Summer                     | Mingechaur Reservoir, Azerbaijan            | 7                                | 13                                                                              | N/S                                     | Swimming                | Slightly raised, erythematous spots, 2-6mm diameter; seen on skin bordering and outside swimsuit                                                                                                               | Benthic <i>Lyngbya kützingii</i> ; also "planktonic blue-green algae colouring the water" | 2 <sup>nd</sup> day after swimming | 10-12 days                                        |                                                                                                                                       |                                      |                                                                                                                                                      | [40]       |
| 1985                      | N/S                        | UK                                          | N/S                              | N/S                                                                             | N/S                                     | Sail-boarding           | Skin rashes                                                                                                                                                                                                    | N/S ("toxic blooms")                                                                      | N/S                                | N/S                                               |                                                                                                                                       | N/S                                  |                                                                                                                                                      | [65]       |
| 1989                      | N/S                        | Japan (lake)                                | 1                                | N/S                                                                             | N/S (adult)                             | Collecting algal scum * | Rashes                                                                                                                                                                                                         | <i>M. aeruginosa</i> containing microcystins                                              | N/S                                | N/S                                               |                                                                                                                                       | N/S                                  |                                                                                                                                                      | [65]       |
| 1989                      | Late summer – early autumn | Bewl Water, Kent, UK                        | 1                                | N/S                                                                             | N/S                                     | Fishing                 | 'blotchy' skin on face and hands after handling water on three separate occasions                                                                                                                              | <i>Microcystis</i> sp                                                                     | Within two hours                   | Several days                                      |                                                                                                                                       | N/S                                  |                                                                                                                                                      | [65]       |
| 1989                      | N/S                        | NRA South West Region, UK                   | N/S ("some NRA staff")           | N/S                                                                             | N/S (adults)                            | Sampling water *        | Tingling sensations on hands                                                                                                                                                                                   | "Potentially toxic cyanobacteria species"                                                 | N/S                                | N/S                                               |                                                                                                                                       | N/S                                  |                                                                                                                                                      | [65]       |
| 1989                      | Early-mid autumn           | Welton Water, Yorks, UK                     | N/S                              | N/S                                                                             | N/S                                     | N/S ("water users")     | Rashes                                                                                                                                                                                                         | <i>Anabaena</i> sp                                                                        | N/S                                | N/S                                               |                                                                                                                                       | N/S                                  |                                                                                                                                                      | [65]       |
| 1991                      | Late spring – early summer | Darling-Barwon river system, NSW, Australia | N/S                              | N/S                                                                             | N/S (adults)                            | Sampling water*         | Skin irritation                                                                                                                                                                                                | <i>Anabaena</i> spp                                                                       | N/S                                | N/S                                               |                                                                                                                                       | N/S                                  |                                                                                                                                                      | [157]      |

| Year                                                                            | Season | Location                         | Number affected                | Estimates of number unaffected | Age            | Water activity                    | Signs & symptoms                                                           | Dominant plankton                                                                                                        | Time of onset after exposure                                                  | Symptom duration | Diagnostic criteria                                                                                                                                                                          | Predisposing conditions | Notes                                                                                                                                                                                 | References |
|---------------------------------------------------------------------------------|--------|----------------------------------|--------------------------------|--------------------------------|----------------|-----------------------------------|----------------------------------------------------------------------------|--------------------------------------------------------------------------------------------------------------------------|-------------------------------------------------------------------------------|------------------|----------------------------------------------------------------------------------------------------------------------------------------------------------------------------------------------|-------------------------|---------------------------------------------------------------------------------------------------------------------------------------------------------------------------------------|------------|
| <b>Cutaneous symptoms</b>                                                       |        |                                  |                                |                                |                |                                   |                                                                            |                                                                                                                          |                                                                               |                  |                                                                                                                                                                                              |                         |                                                                                                                                                                                       |            |
| 2003                                                                            | Summer | Lake Salajärvi                   | 1                              | N/S                            | N/S            | Swimming                          | Rash                                                                       | <i>Anabaena lemmermannii</i> (dominant) + low levels of <i>M. aeruginosa</i> and <i>M. flos-aquae</i> .                  | N/S                                                                           | N/S              |                                                                                                                                                                                              | N/S                     | Saxitoxin, microcystins and anatoxin-a products present in water samples                                                                                                              | [158]      |
| 2003                                                                            | N/S    | Lake Sompanen, Finland           | 1                              | N/S                            | 7 yo male      | N/S                               | "extensive" generalised rash                                               | Cyanobacteria visible in water; saxitoxin found in water samples in 2002 & 2004                                          | N/S                                                                           | N/S              |                                                                                                                                                                                              | N/S                     |                                                                                                                                                                                       | [158]      |
| <b>Gastro-intestinal symptoms (nausea, vomiting, diarrhoea, abdominal pain)</b> |        |                                  |                                |                                |                |                                   |                                                                            |                                                                                                                          |                                                                               |                  |                                                                                                                                                                                              |                         |                                                                                                                                                                                       |            |
| 1959                                                                            | Summer | One of Katepwa Lakes, SK, Canada | Report of single subject, male | N/S                            | N/S (adult)    | Swimming                          | Headache, nausea, G-I upset                                                | N/S                                                                                                                      | During night after swimming                                                   | <48 hours.       | Stool sample showed "many tiny greenish spheres which resembled in size and morphology the cells of <i>Microcystis</i> ". Stool specimen negative for <i>Salmonella</i> and <i>Entamoeba</i> | N/S                     | Subject sought medical advice for gastroenteritis, admitted to hospital, given oral chloramphenicol. Recovery within 24 hours of admission                                            | [55]       |
| 1959                                                                            | Summer | Long Lake, SK, Canada            | 10                             | N/S                            | N/S (children) | Swimming                          | Diarrhoea, vomiting                                                        | N/S. Subjects swam in "algae-covered lake water". Dried <i>Microcystis</i> and <i>Anabaena</i> scum found later on shore | N/S. Reported to local medical officer with illness on the day after exposure | N/S              | Stool specimen from one child contained cells resembling <i>Anabaena</i> "in great numbers"                                                                                                  |                         | Local farmer reported that two cows died after drinking from the lake 12-16 hours previously, during an algal bloom. A third sick cow recovered after receiving penicillin injections | [55]       |
| N/S                                                                             | N/S    | N/S (lake)                       | Single subject, male           | N/S                            | 4              | Fell into lake, swallowed water # | Abdominal pain, nausea, vomiting, diarrhoea, "wooziness", headache, thirst | N/S                                                                                                                      | Day of exposure: G-I illness. Next day: wooziness, headache, thirst           | N/S              | <i>Aphanizomenon</i> found in stool and vomitus specimens                                                                                                                                    | N/S                     |                                                                                                                                                                                       | [67]       |
| 1961                                                                            | N/S    | N/S                              | 4                              | N/S                            | N/S (students) | Swimming                          | Headache, malaise, diarrhoea                                               | Heavy growth of <i>Microcystis</i> and <i>Anabaena</i>                                                                   | N/S                                                                           | N/S              |                                                                                                                                                                                              | N/S                     |                                                                                                                                                                                       | [67]       |

| Year                                                                            | Season       | Location                            | Number affected | Estimates of number unaffected | Age             | Water activity          | Signs & symptoms     | Dominant plankton                                       | Time of onset after exposure | Symptom duration | Diagnostic criteria                                               | Predisposing conditions | Notes                                                                                                                                    | References |
|---------------------------------------------------------------------------------|--------------|-------------------------------------|-----------------|--------------------------------|-----------------|-------------------------|----------------------|---------------------------------------------------------|------------------------------|------------------|-------------------------------------------------------------------|-------------------------|------------------------------------------------------------------------------------------------------------------------------------------|------------|
| <b>Gastro-intestinal symptoms (nausea, vomiting, diarrhoea, abdominal pain)</b> |              |                                     |                 |                                |                 |                         |                      |                                                         |                              |                  |                                                                   |                         |                                                                                                                                          |            |
| 1989                                                                            | Early autumn | Rutland Water, Leics, UK            | N/S             | N/S                            | 2 & 3 year-olds | Playing at edge of scum | Vomiting & diarrhoea | <i>M. aeruginosa</i>                                    | N/S                          | N/S              | Microcystin-LR found to be principal cyanobacterial toxin present | N/S                     | 20 sheep and 15 dogs died over approx 3 weeks in late summer – early spring after contact with bloom scum                                | [6]        |
| 1990                                                                            | N/S          | Unnamed lake, Tiel, The Netherlands | N/S             | N/S                            | N/S             | Swimming                | “G-I complaints”     | <i>Anabaena flos-aquae</i>                              | N/S                          | N/S              | Water quality parameters and food-borne pathogen testing negative | N/S                     | Mouse bioassay and HPLC-UV confirmed presence of anatoxin-a                                                                              | [159]      |
| 2003                                                                            | Summer       | Lake Iso-Kukkanen, Finland          | 1               | N/S                            | 10 yo male      | Swimming                | Abdominal pains      | <i>A. lemmermannii</i> sole or dominant cyanobacterium. | N/S                          | Several hours    |                                                                   | N/S                     | Saxitoxin measured at 13-270 µg/L (depending on methods). Low levels of microcystins found. Anatoxin-a and degradation products reported | [158]      |

#### Progression to fatal illness

|      |            |                                      |   |   |                          |                                                                                                                   |                                                                                                                                                                                                                                                                                                    |                                                                                                                                                           |     |     |                                                                                                                                                                                                                                                                                            |     |                                                                                                                                                                                                                                |                 |
|------|------------|--------------------------------------|---|---|--------------------------|-------------------------------------------------------------------------------------------------------------------|----------------------------------------------------------------------------------------------------------------------------------------------------------------------------------------------------------------------------------------------------------------------------------------------------|-----------------------------------------------------------------------------------------------------------------------------------------------------------|-----|-----|--------------------------------------------------------------------------------------------------------------------------------------------------------------------------------------------------------------------------------------------------------------------------------------------|-----|--------------------------------------------------------------------------------------------------------------------------------------------------------------------------------------------------------------------------------|-----------------|
| 2002 | Mid-summer | Golf course pond, Milwaukee, WI, USA | 5 | 0 | 17 yo male and 4 friends | “splashing and diving”. Two most severely affected boys had their heads under water for varying periods of time # | 17-year-old developed nausea, vomiting, progressed to “shock” and “seizure”, acute heart failure; death occurred approx. 48 hours after exposure. One teenager who also apparently ingested water developed severe diarrhoea and abdominal pain. The other three youths developed “minor symptoms” | Presumably <i>A. flos-aquae</i> containing anatoxin-a, determined from blood and stool samples of the boy that died and the other severely affected youth | N/S | N/S | Analysis of “tissue, blood and other fluid samples” from the two severely affected teenagers. Anatoxin-a found in unspecified sample/s. Autopsy showed “acute heart damage” but no evidence of meningitis or encephalitis. Analyses for pesticides, parasites and other pathogens negative | N/S | The unusual feature of this case is the length of time – 48 hours – between exposure and ingestion of contaminated water and subsequent death. Uncertainty exists regarding the identification of anatoxin-a in tissue samples | [43, 44, 62-64] |
|------|------------|--------------------------------------|---|---|--------------------------|-------------------------------------------------------------------------------------------------------------------|----------------------------------------------------------------------------------------------------------------------------------------------------------------------------------------------------------------------------------------------------------------------------------------------------|-----------------------------------------------------------------------------------------------------------------------------------------------------------|-----|-----|--------------------------------------------------------------------------------------------------------------------------------------------------------------------------------------------------------------------------------------------------------------------------------------------|-----|--------------------------------------------------------------------------------------------------------------------------------------------------------------------------------------------------------------------------------|-----------------|

| Year                                                                                                                             | Season       | Location                    | Number affected                | Estimates of number unaffected | Age                | Water activity                                                                  | Signs & symptoms                                                                                                                                                           | Dominant plankton                                                                                                        | Time of onset after exposure                                                                                      | Symptom duration                                                 | Diagnostic criteria                                                                                                                                 | Predisposing conditions | Notes                                                                                                                                                                       | References             |
|----------------------------------------------------------------------------------------------------------------------------------|--------------|-----------------------------|--------------------------------|--------------------------------|--------------------|---------------------------------------------------------------------------------|----------------------------------------------------------------------------------------------------------------------------------------------------------------------------|--------------------------------------------------------------------------------------------------------------------------|-------------------------------------------------------------------------------------------------------------------|------------------------------------------------------------------|-----------------------------------------------------------------------------------------------------------------------------------------------------|-------------------------|-----------------------------------------------------------------------------------------------------------------------------------------------------------------------------|------------------------|
| <b>Cold &amp; flu-like symptoms (incl. fever, headache, myalgia, arthralgia, sore throat, respiratory and gastro-intestinal)</b> |              |                             |                                |                                |                    |                                                                                 |                                                                                                                                                                            |                                                                                                                          |                                                                                                                   |                                                                  |                                                                                                                                                     |                         |                                                                                                                                                                             |                        |
| 1959                                                                                                                             | Summer       | Echo Lake, SK, Canada       | Report of single subject, male | N/S                            | N/S (adult)        | Intending to swim – fell into lake, swallowed an estimated half-pint of water # | Abdominal cramps and pain, nausea, vomiting, painful diarrhoea, fever, severe headache, weakness, pain in limb muscles and joints. Stools and vomitus were slimy and green | N/S. Lake had a visible bloom on day of exposure. <i>Microcystis</i> and <i>Anabaena</i> bloom 35 days prior to exposure | 3 hours: abdominal pain, nausea, vomiting<br>5 hours: diarrhoea; next morning: fever, headache, myalgia, weakness | Recovering when questioned on 2 <sup>nd</sup> day after exposure | Stool specimen showed "innumerable spheres of <i>Microcystis</i> and 2-3 well-preserved curved chains of <i>A. circinalis</i> per high-power field" | N/S                     | During bloom 35 days prior to exposure, an unknown number of dogs and geese died after swimming in the lake. Other dogs sickened after drinking lake water. Also fish kills | [55]                   |
| N/S                                                                                                                              | N/S          | N/S (swimming hole)         | Single subject, male           | N/S                            | 12                 | Swimming                                                                        | Fever, loss of consciousness for six hours, dyspnoea, pneumonia, myalgia, arthralgia                                                                                       | Abundant <i>M. aeruginosa</i>                                                                                            | N/S (onset reported as sudden, with subsequent myalgia and arthralgia)                                            | N/S                                                              | Stool sample: <i>Aeromonas</i> (Gram-negative bacteria), <i>Spirogyra</i> and <i>Mougeotia</i> (both green algae)                                   | N/S                     |                                                                                                                                                                             | [67]                   |
| 1979                                                                                                                             | Late summer  | Lake Wallenpaupack, PA, USA | 15                             | N/S                            | N/S                | Swimming                                                                        | Vomiting, nausea, diarrhoea, eye irritation, sore throat, fever, earache                                                                                                   | N/S. See above.                                                                                                          | Symptoms occurred "a short time after contact with lake water"                                                    | G-I symptoms: 24-48 hours                                        |                                                                                                                                                     | N/S                     | Affected individuals all holidaying in rental cottages. Well water to cottages free of bacterial contamination                                                              | [68]                   |
| 1979                                                                                                                             | Late summer  | Arrowhead Lake, PA, USA     | Single female                  | N/S                            | N/S ("young girl") | Swimming #                                                                      | Chills, sore throat, fever, nausea, diarrhoea                                                                                                                              | N/S                                                                                                                      | "within several hours"                                                                                            | Approx. 3 days                                                   |                                                                                                                                                     | N/S                     |                                                                                                                                                                             | [68]                   |
| 1989                                                                                                                             | Early autumn | Rudyard Lake, Staffs, UK    | 2                              | N/S                            | 16                 | Swimming and canoeing exercises, the latter involving 360° rolls * #            | Malaise, sore throat, circum-oral blistering, left-sided pleuritic pain, dry cough, vomiting, central abdominal pain, diarrhoea, fever                                     | <i>M. aeruginosa</i>                                                                                                     | Day after exposure                                                                                                | <2 weeks                                                         | Microcystin-LR found to be principal cyanobacterial toxin present                                                                                   | N/S                     | Both were hospitalised, having developed left lower-lobe pneumonia accompanied by thrombocytopenia                                                                          | [23, 57, 74, 160, 161] |
| 1989                                                                                                                             | Early autumn | Rudyard Lake, Staffs, UK    | 8                              | N/S                            | N/S (soldiers)     | As above * #                                                                    | Sore throat, headache, abdominal pain, dry cough, diarrhoea, vomiting, blistered mouth                                                                                     | <i>M. aeruginosa</i>                                                                                                     | N/S                                                                                                               | N/S                                                              | See above                                                                                                                                           | N/S                     | All subjects were soldiers engaged in canoeing exercises, subsequently admitted to barracks medical centre                                                                  | [23, 57, 74, 160, 161] |

| Year                                                                                                                             | Season      | Location                                     | Number affected                                                                     | Estimates of number unaffected | Age             | Water activity       | Signs & symptoms                                                                                                                                           | Dominant plankton                                                         | Time of onset after exposure                                                                                                 | Symptom duration                                  | Diagnostic criteria                                                                                                                                            | Predisposing conditions                                       | Notes                                                                                                                                                              | References |
|----------------------------------------------------------------------------------------------------------------------------------|-------------|----------------------------------------------|-------------------------------------------------------------------------------------|--------------------------------|-----------------|----------------------|------------------------------------------------------------------------------------------------------------------------------------------------------------|---------------------------------------------------------------------------|------------------------------------------------------------------------------------------------------------------------------|---------------------------------------------------|----------------------------------------------------------------------------------------------------------------------------------------------------------------|---------------------------------------------------------------|--------------------------------------------------------------------------------------------------------------------------------------------------------------------|------------|
| <b>Cold &amp; flu-like symptoms (incl. fever, headache, myalgia, arthralgia, sore throat, respiratory and gastro-intestinal)</b> |             |                                              |                                                                                     |                                |                 |                      |                                                                                                                                                            |                                                                           |                                                                                                                              |                                                   |                                                                                                                                                                |                                                               |                                                                                                                                                                    |            |
| 1992                                                                                                                             | Mid-spring  | Darling River, Wilcannia, NSW, Australia     | 2                                                                                   | N/S                            | N/S - teenagers | Swimming             | Gastroenteritis and myalgia                                                                                                                                | <i>Anabaena</i> sp                                                        | N/S                                                                                                                          | Symptoms resolved after 48 hrs                    | One subject required admission to hospital.                                                                                                                    | N/S                                                           | Some town residents reported itchy skin rashes after showering, even after town water supply was carbon-filtered                                                   | [162]      |
| N/S                                                                                                                              | N/S         | Unnamed reservoir, UK                        | Single subject, male                                                                | N/S                            | 39              | Windsurfing          | Fever, nausea, vomiting                                                                                                                                    | N/S, but microcystin isolated from reservoir; several sheep and dogs died | N/S "shortly after windsurfing trip"                                                                                         | N/S                                               | Liver function tests, liver biopsy                                                                                                                             | No significant past history, no medications                   | Mild hepatic dysfunction investigated six weeks after exposure                                                                                                     | [163]      |
| <b>Mixed symptoms</b>                                                                                                            |             |                                              |                                                                                     |                                |                 |                      |                                                                                                                                                            |                                                                           |                                                                                                                              |                                                   |                                                                                                                                                                |                                                               |                                                                                                                                                                    |            |
| 1945                                                                                                                             | Late summer | Lake Keesus, Waukesha County, WI, USA        | Report of single subject, female                                                    | N/S                            | 39              | Swimming             | Gross eyelid oedema, nasal congestion, generalised urticarial rash                                                                                         | N/S                                                                       | "while swimming"                                                                                                             | N/S                                               | Skin test with Oscillatoreaceae extract (0.03mL of 1:10,000 dilution) resulted in immediate and severe local reaction treated by local injection of adrenaline | Long-standing history of autumn hay-fever and seasonal asthma | Oscillatoreaceae extracts elicited positive (but unspecified) reactions in "many individuals who knew that swimming caused hay fever" at dilutions up to 1:100,000 | [53]       |
| 1946                                                                                                                             | Late summer | Lake Keesus, WI, USA                         | Same subject                                                                        | N/S                            |                 | Swimming             | As above                                                                                                                                                   | N/S                                                                       | N/S                                                                                                                          | N/S                                               |                                                                                                                                                                |                                                               |                                                                                                                                                                    | [53]       |
| 1973-4                                                                                                                           | Summer      | Belgrano Park pond, Santa Fe City, Argentina | N/S                                                                                 | N/S                            | N/S             | Swimming and bathing | G-I symptoms, dermatitis, otitis, conjunctivitis                                                                                                           | Mainly <i>M. aeruginosa</i> ; bloom contained "up to 60,000 colonies/mL"  | N/S                                                                                                                          | N/S                                               | N/S                                                                                                                                                            | N/S                                                           |                                                                                                                                                                    | [164]      |
| 1979                                                                                                                             | Late summer | Arrowhead Lake, PA, USA                      | Initial reports: 20-30 children, several adults. 12 children + 1 adult investigated | N/S                            | 4-12, + adult   | Swimming             | Headache: 8/13<br>stomach cramps: 9/13<br>nausea: 5/13<br>vomiting: 7/13<br>diarrhoea: 11/13<br>fever: 5/13<br>rash: 1/13<br>sore or inflamed throat: 3/13 | N/S                                                                       | During exposure, to 12 hours after exposure. Rash on arms & legs of adult ♀ developed "shortly after wading along lake edge" | Most symptoms: <72 hours<br>All symptoms: ≤5 days | Stool samples of four children negative for <i>Salmonella</i> and <i>Shigella</i> . Throat swab of one child with sore throat negative for viral involvement   | N/S                                                           | Routine weekly monitoring for faecal coliforms showed counts were ≤40/100mL prior to incident                                                                      | [68]       |

| Year                  | Season        | Location                                     | Number affected            | Estimates of number unaffected | Age         | Water activity                                   | Signs & symptoms                                                       | Dominant plankton               | Time of onset after exposure | Symptom duration | Diagnostic criteria                                                                                                              | Predisposing conditions | Notes                                                                                                                                                                                         | References   |
|-----------------------|---------------|----------------------------------------------|----------------------------|--------------------------------|-------------|--------------------------------------------------|------------------------------------------------------------------------|---------------------------------|------------------------------|------------------|----------------------------------------------------------------------------------------------------------------------------------|-------------------------|-----------------------------------------------------------------------------------------------------------------------------------------------------------------------------------------------|--------------|
| <b>Mixed symptoms</b> |               |                                              |                            |                                |             |                                                  |                                                                        |                                 |                              |                  |                                                                                                                                  |                         |                                                                                                                                                                                               |              |
| 1980                  | Mid-summer    | Pocono Highlands Lake, PA, USA               | N/S "swimmers"             | N/S                            | N/S         | Swimming                                         | Eye irritation, earache, sore throat                                   | <i>Anabaena</i> sp.             | N/S                          | N/S              | Water samples produced signs of poisoning in mice suggestive of hepatotoxin. LD <sub>50</sub> = 90 mg/kg (i.p. mouse)            | N/S                     |                                                                                                                                                                                               | [56]         |
| 1980                  | Late summer   | Lake Lahonton, NV, USA                       | N/S "several... affected " | N/S                            | N/S         | Water skiing, swimming                           | Erythema, eye irritation, dizziness, nausea, stomach cramps, diarrhoea | <i>Aphanizomenon flos-aquae</i> | N/S                          | N/S              | LD <sub>50</sub> = 500 mg/kg body weight (i.p. mouse)                                                                            | N/S                     |                                                                                                                                                                                               | [56]         |
| 1980                  | Mid-summer    | Camp William Penn, PA, USA                   | 75-100                     | N/S                            | N/S         | N/S ("campers affected from contact with water") | Conjunctivitis, sore-red throat, headaches, diarrhoea, nausea          | <i>Anabaena</i> sp.             | N/S                          | N/S              |                                                                                                                                  | N/S                     |                                                                                                                                                                                               | [56]         |
| 1981                  | Mid-summer    | Harveys Lake, PA, USA                        | N/S ("many reports...")    | N/S                            | N/S         | N/S                                              | Skin irritation, nausea, dizziness, diarrhoea                          | <i>Anabaena flos-aquae</i>      | N/S                          | N/S              | Mouse toxicity testing of water: neurotoxins and hepatotoxins present. LD <sub>50</sub> = 125 mg/kg                              | N/S                     | Lake closed to public access until early spring                                                                                                                                               | [56]         |
| 1989                  | Early autumn  | Rutland Water, Leics, UK, and other UK lakes | N/S ("several")            | N/S                            | N/S         | Sail-boarding #                                  | Skin rashes, nausea, vomiting, blistering inside mouth, severe thirst  | <i>M. aeruginosa</i>            | N/S                          | N/S              | Microcystin-LR found to be principal cyanobacterial toxin present                                                                | N/S                     | 20 sheep and 15 dogs died over approx. 3 weeks in late summer – early spring after contact with bloom scum                                                                                    | [6, 65, 160] |
| 1990                  | Spring        | Lake Cargelligo, NSW, Australia              | 2 or 3                     | N/S                            | N/S         | Swimming                                         | Two cases of conjunctivitis, one case of rash                          | <i>Anabaena circinalis</i>      | N/S                          | N/S              |                                                                                                                                  | N/S                     | Lake closed as water supply for one month while bloom evident                                                                                                                                 | [66]         |
| 1991                  | Summer-Autumn | Lakes Alexandrina and Albert, SA, Australia  | 1                          | N/S                            | N/S (adult) | Crayfishing                                      | Skin and/or eye symptoms (pruritus, skin rash, sore red eyes)          | <i>Nodularia</i> sp             | N/S                          | N/S              | Case identified retrospectively by either interview with local residents, local health workers or surveillance through local GPs | N/S                     | Seven more cases identified with skin and/or eye symptoms. Two of them also had asthma symptoms, one had hay fever symptoms, another a sore throat. Water contact was by showering or bathing | [165]        |

| Year                  | Season                     | Location                                 | Number affected | Estimates of number unaffected                                                                                                            | Age                      | Water activity                                                                                                                | Signs & symptoms                                                                                                                                                                                                                                     | Dominant plankton                                                           | Time of onset after exposure | Symptom duration | Diagnostic criteria                                                                                             | Predisposing conditions | Notes                                                                                                                                                        | References |
|-----------------------|----------------------------|------------------------------------------|-----------------|-------------------------------------------------------------------------------------------------------------------------------------------|--------------------------|-------------------------------------------------------------------------------------------------------------------------------|------------------------------------------------------------------------------------------------------------------------------------------------------------------------------------------------------------------------------------------------------|-----------------------------------------------------------------------------|------------------------------|------------------|-----------------------------------------------------------------------------------------------------------------|-------------------------|--------------------------------------------------------------------------------------------------------------------------------------------------------------|------------|
| <b>Mixed symptoms</b> |                            |                                          |                 |                                                                                                                                           |                          |                                                                                                                               |                                                                                                                                                                                                                                                      |                                                                             |                              |                  |                                                                                                                 |                         |                                                                                                                                                              |            |
| 1991                  | Late spring – early summer | Darling River, Wilcannia, NSW, Australia | 1               | Sole report after surveillance requests to report confirmed or suspected cyanobacteria-related illness during an extensive riverine bloom | N/S (adult)              | Water skiing                                                                                                                  | Skin rash, conjunctivitis, diarrhoea, respiratory difficulty                                                                                                                                                                                         | <i>Anabaena</i> spp                                                         | N/S                          | N/S              |                                                                                                                 | N/S                     | All schools along the river system were asked to report increases in illness-related absenteeism, especially for G-I symptoms. No such increase was reported | [157]      |
| 1991-2                | Summer                     | River Murray, SA, Australia              | 11              | N/S                                                                                                                                       | 1-64                     | “water sport.... particularly skiing”. One of these cases had skin contact through both water sport and residential water use | Contact exposure (n=2): rash, itching, mouth blistering, eye irritation; oral ingestion (n=3): diarrhoea, vomiting, nausea, muscle weakness, sore throat, respiratory difficulty, headache; contact + oral exposure (n=6): mixture of above symptoms | Predominantly <i>A. circinalis</i>                                          | N/S                          | N/S              | Cases investigated following telephone or personal complaints to health authorities and water supply management | N/S                     | 15 further cases with exposure to River Murray water from reticulated water supply                                                                           | [166]      |
| 1994                  | N/S                        | Lake Velencei, Hungary                   | 100-150         | N/S                                                                                                                                       | Children at a youth camp | N/S                                                                                                                           | skin and eye irritation                                                                                                                                                                                                                              | “heavy bloom” of <i>M. aeruginosa</i>                                       | N/S                          | N/S              | N/S                                                                                                             | N/S                     |                                                                                                                                                              | [167]      |
| 1996                  | N/S                        | Hollingworth Lake, UK                    | 11              | N/S                                                                                                                                       | N/S (sea cadets)         | Canoe capsizing trials *                                                                                                      | Facial rashes, asthmatic signs, dry sporadic cough, vomiting                                                                                                                                                                                         | <i>Planktothrix agardhii</i> , containing three microcystins                | Day of, and after exposure   | N/S              |                                                                                                                 | N/S                     |                                                                                                                                                              | [23]       |
| 1997                  | Autumn                     | Lake Sammamish, WA, USA                  | N/S (“several”) | N/S                                                                                                                                       | “young children”         | Swimming                                                                                                                      | G-I complaints, rashes                                                                                                                                                                                                                               | <i>M. aeruginosa</i> , microcystins measured at approx. 500 µg/g dry weight | N/S                          | N/S              | N/S                                                                                                             | N/S                     | A dog began “heaving and coughing”, died four hours after exposure to bloom                                                                                  | [45, 46]   |



| Year                  | Season | Location                   | Number affected | Estimates of number unaffected | Age        | Water activity | Signs & symptoms         | Dominant plankton                                       | Time of onset after exposure | Symptom duration | Diagnostic criteria | Predisposing conditions | Notes                                                                                                                                   | References |
|-----------------------|--------|----------------------------|-----------------|--------------------------------|------------|----------------|--------------------------|---------------------------------------------------------|------------------------------|------------------|---------------------|-------------------------|-----------------------------------------------------------------------------------------------------------------------------------------|------------|
| <b>Mixed symptoms</b> |        |                            |                 |                                |            |                |                          |                                                         |                              |                  |                     |                         |                                                                                                                                         |            |
| 2003                  | N/S    | Lake Iso-Kukkanen, Finland | 1               | N/S                            | 2 yo child | Swimming       | Fever and eye irritation | <i>A. lemmermannii</i> sole or dominant cyanobacterium. | N/S                          | N/S              |                     | N/S                     | Saxitoxin measured at 13-270 µg/L (depending on methods). Low levels of microcystins found. Anatoxina and degradation products reported | [158]      |

# – cyanobacteria-affected water reportedly ingested (table column: “Water activity”)

\* – occupational exposure (table column: “Water activity”)

N/S – not stated
